# Supplementary material for: Phytochemical Constituents of Citrus hystrix DC. Leaves Attenuate Inflammation via NF-κB Signaling and NLRP3 Inflammasome Activity in Macrophages
Source: MDPI journal article supplement (doi:10.3390/biom11010105), 2021-01-14
Supplement: s1 [file s1]

# Phytochemical Constituents of *Citrus hystrix* DC. Leaves Attenuate Inflammation via Nf- $\kappa$ B Signaling and Nlrp3 Inflammasome Activity in Macrophages

Watunyoo Buakaew <sup>1</sup>, Rungnapa Pankla Sranujit <sup>2</sup>, Chanai Noysang <sup>2</sup>, Yordhathai Thongsri<sup>1</sup>, Pachuen Potup <sup>1</sup>, Nitra Nuengchamnon<sup>3</sup>, Nungruthai Suphrom <sup>4</sup> and Kanchana Usuwanthim<sup>1,\*</sup>

<sup>1</sup> Cellular and Molecular Immunology Research Unit, Faculty of Allied Health Sciences, Naresuan University, Phitsanulok 65000, Thailand

<sup>2</sup> Thai Traditional Medicine College, Rajamangala University of Technology Thanyaburi, Pathum Thani 12130, Thailand

<sup>3</sup> Department of Chemistry, Faculty of Science and Center of Excellence for Innovation in Chemistry, Naresuan University, Phitsanulok 65000, Thailand

<sup>4</sup> Science Laboratory Centre, Faculty of Science, Naresuan University, Phitsanulok 65000, Thailand; Nitran@nu.ac.th

\* Correspondence: Kanchanau@nu.ac.th; Tel.: +66-55-966-411

**Citation:** Buakaew, W.; Sranujit, R.P.; Noysang, C.; Thongsri, Y.; Potup, P.; Nuengchamnon, N.; Suphrom, N.; Usuwanthim, K. Phytochemical Constituents of *Citrus hystrix* DC. Leaves Attenuate Inflammation via Nf- $\kappa$ B Signaling and Nlrp3 Inflammasome Activity in Macrophages. **2021**, *11*, 105. <https://doi.org/10.3390/biom11010105>

Received: 16 December 2020

Accepted: 12 January 2021

Published: 14 January 2021

**Publisher's Note:** MDPI stays neutral with regard to jurisdictional claims in published maps and institutional affiliations.

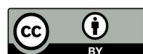

**Copyright:** © 2021 by the authors. Licensee MDPI, Basel, Switzerland. This article is an open access article distributed under the terms and conditions of the Creative Commons Attribution (CC BY) license (<http://creativecommons.org/licenses/by/4.0/>).

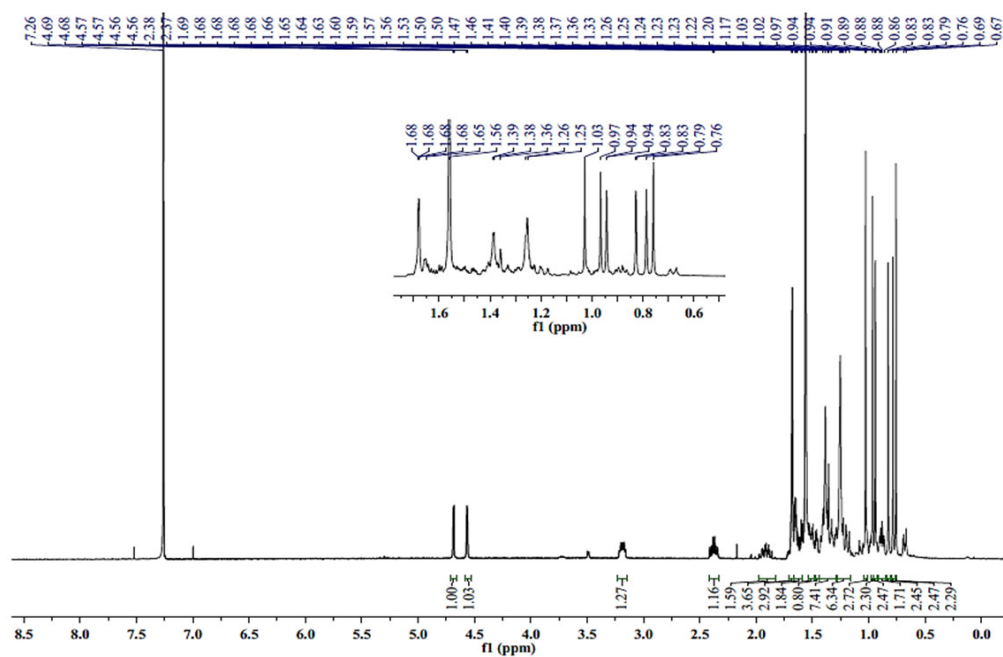

Figure S 1  $^1\text{H}$  NMR spectrum of lupeol (at 400 MHz in  $\text{CDCl}_3$ )

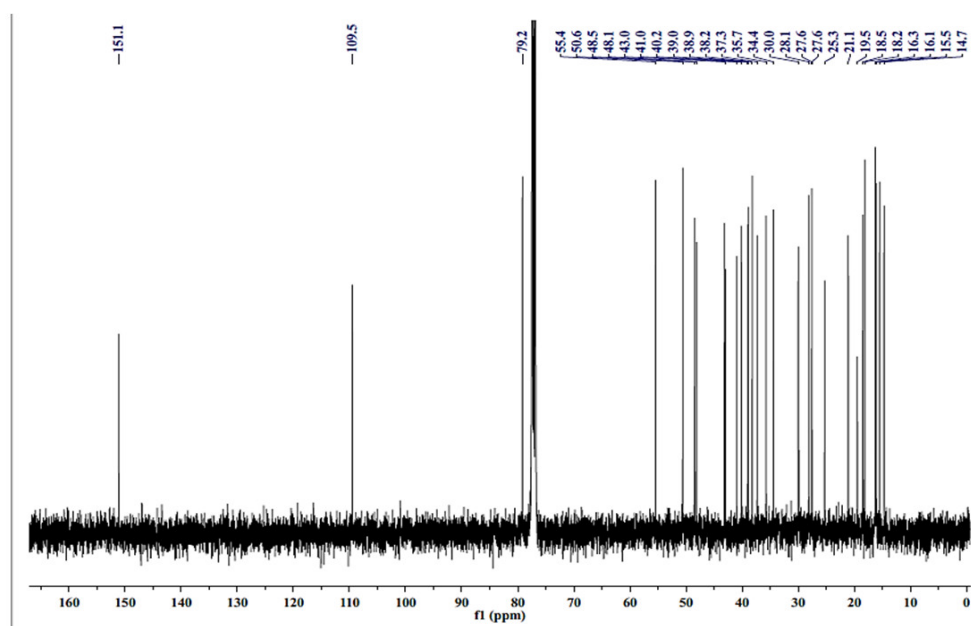

Figure S 2 NMR spectrum of lupeol (at 100 MHz in CDCl<sub>3</sub>)

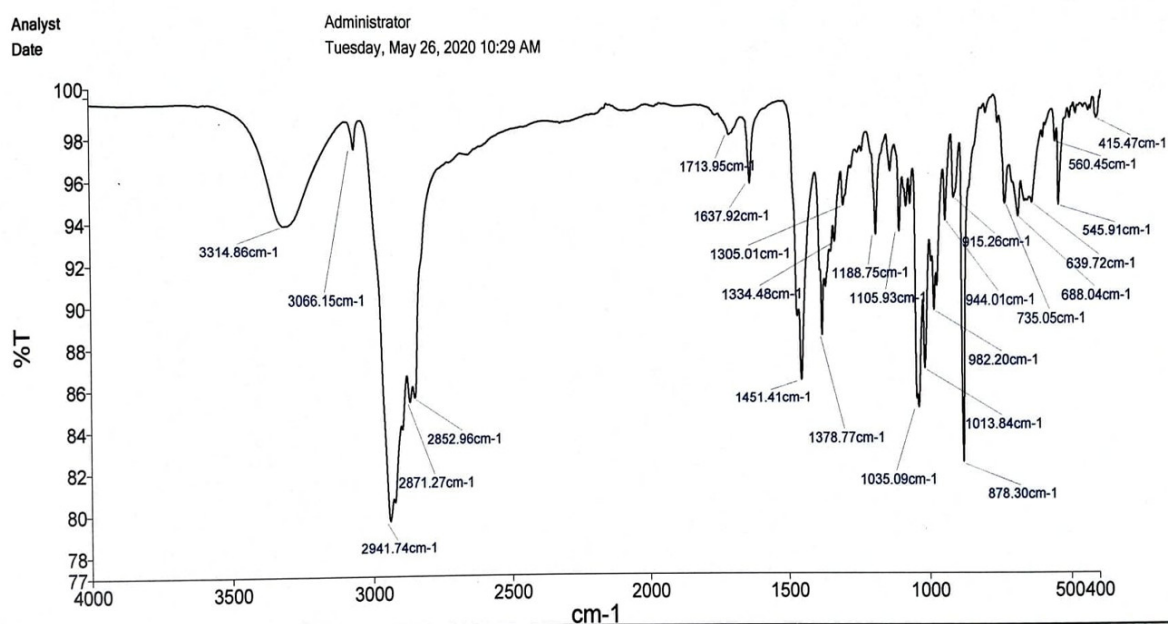

Figure S 2 FT-IR spectrum of lupeol

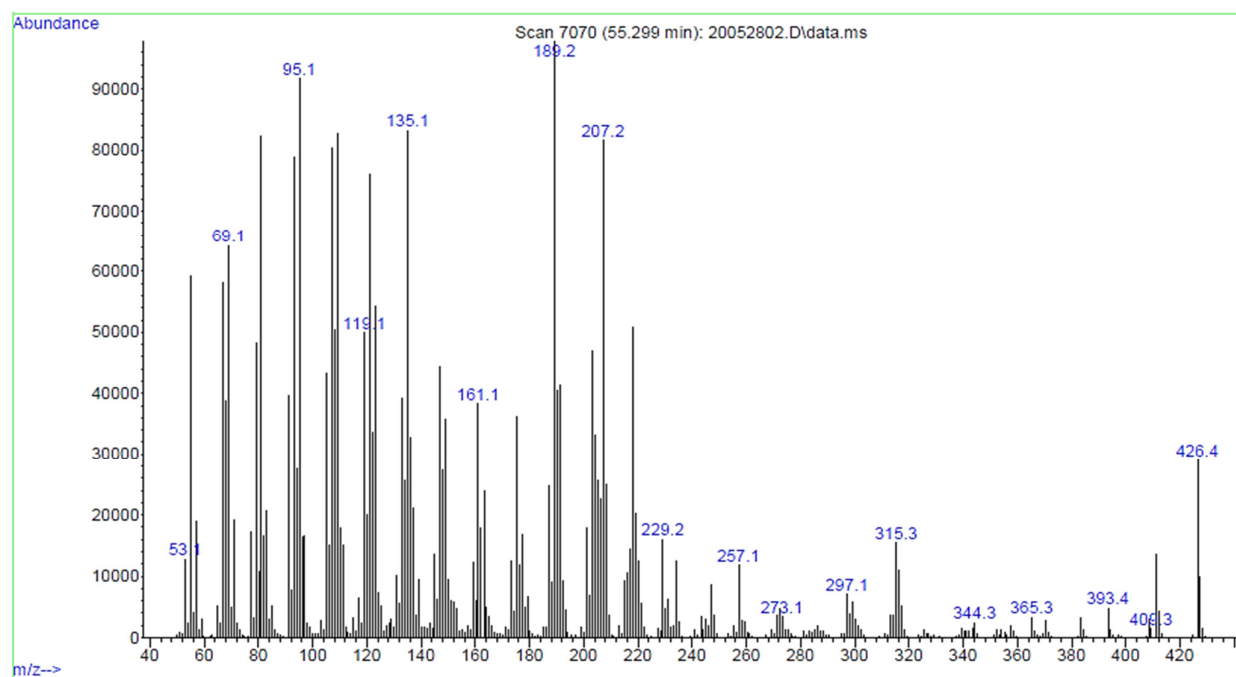

Figure S 3 EI-MS spectrum of lupeol

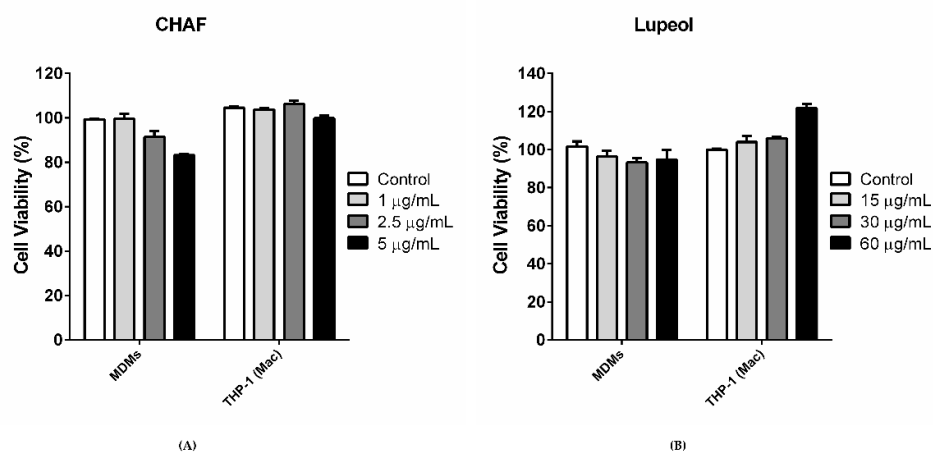

**Figure S 4 Cellular cytotoxicity of CHAF and Lupeol.** Cellular cytotoxicity of CHAF and Lupeol. (A) The effect of CHAF and (B) Lupeol on cell viability percentage in human MDMs and THP-1-derived macrophages. Cells were seeded in 96-well plate at density  $5 \times 10^4$  cell/well, then treated with indicated concentration of CHAF and incubated for 24 h. The cell viability was determined using MTT assay. The final concentration of DMSO used in this study was  $< 0.1\%$ . The data are presented as mean  $\pm$  SD.

### 3. Western blotting pictures

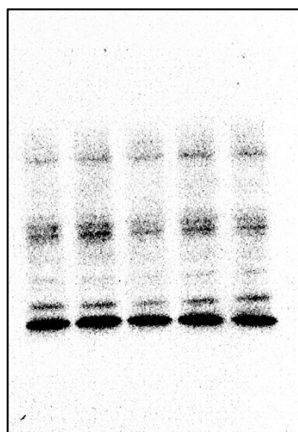

phospho IκB-α

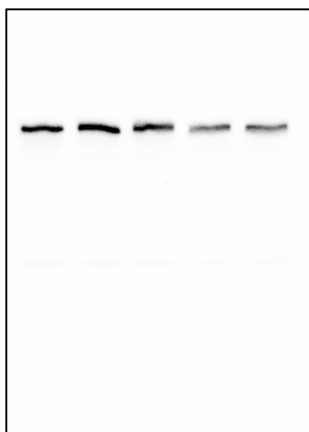

NF-κB p65

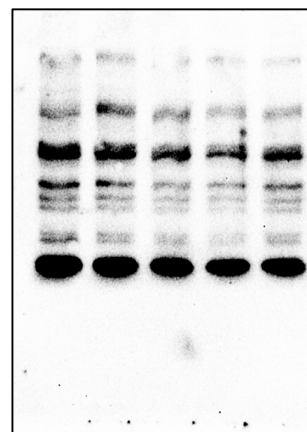

Cyclooxygenase-2

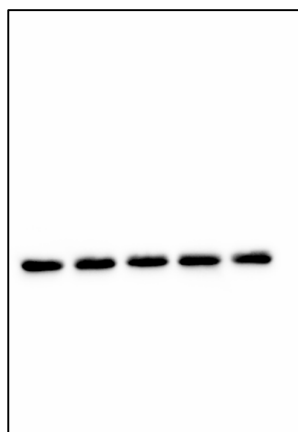

Beta actin

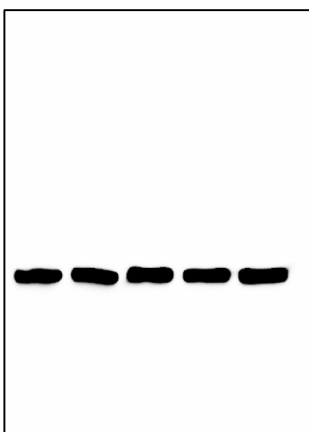

Beta actin

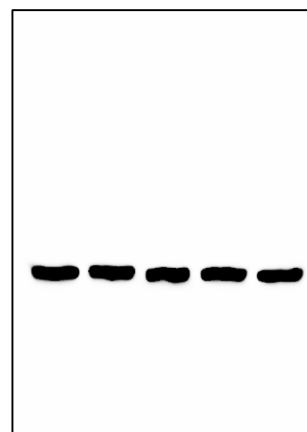

Beta actin
